# Supplementary material
Source: Copernicus journal article supplement (doi:10.5194/ejm-38-373-2026)
Supplement: Supplementary file [file ejm-38-373-2026-supplement-title-page.pdf › ejm-38-373-2026-supplement-title-page.pdf]

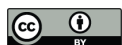

*Supplement of*

## **Yttrotungstite-(Nd), a new mineral species from the Nyakabingo tungsten mine, Kigali, Rwanda**

**Frédéric Hatert et al.**

*Correspondence to:* Frédéric Hatert (fhatert@uliege.be)

- ejm-38-373-2026-supplement-title-page.pdf
- Supplementary material-yttrotungstite
  - Raman spectra.zip
  - Yttrotungstite-4.cif
  - Yttrotungstite-4.fcf

The copyright of individual parts of the supplement might differ from the article licence.
